# Supplementary material for: Integrated microsystems for the in situ genetic detection of dengue virus in whole blood using direct sample preparation and isothermal amplification
Source: Royal Society of Chemistry journal article supplement (doi:10.1039/c9an02435b), 2020-01-01
Supplement: c9an02435b1.pdf [file c9an02435b1.pdf]

## **Electronic supplementary information**

### **Integrated microsystems for *in situ* genetic detection of dengue virus in whole blood using direct sample preparation and isothermal amplification**

**Hyun Jin Yoo‡, Changyoon Baek‡, Min-Ho Lee\*, and Junhong Min\***

School of Integrative Engineering, Chung-Ang University, Heukseok-dong, Dongjak-gu, Seoul,  
06974, South Korea

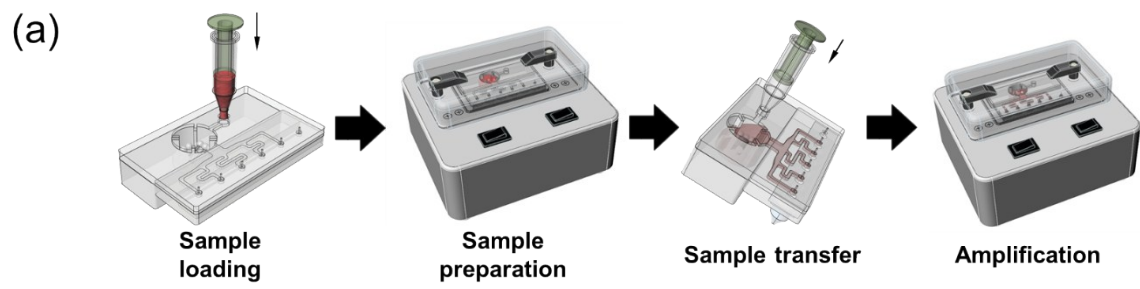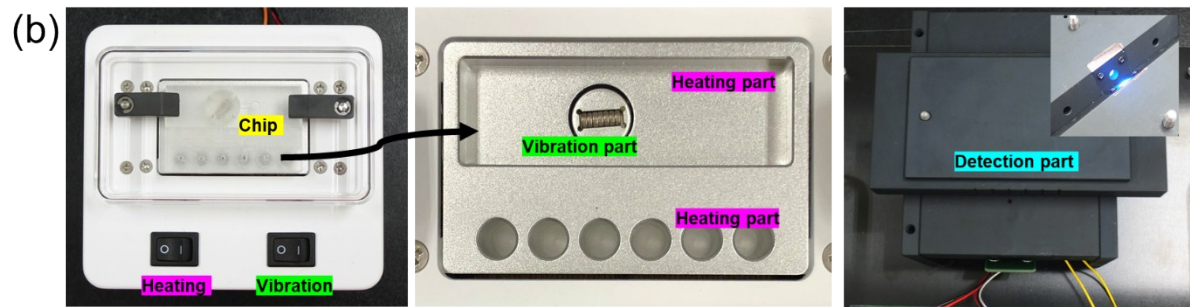

**Fig. S1.** (a) 3D modeling image for process and (b) real image of MB-based dengue virus detection modules.

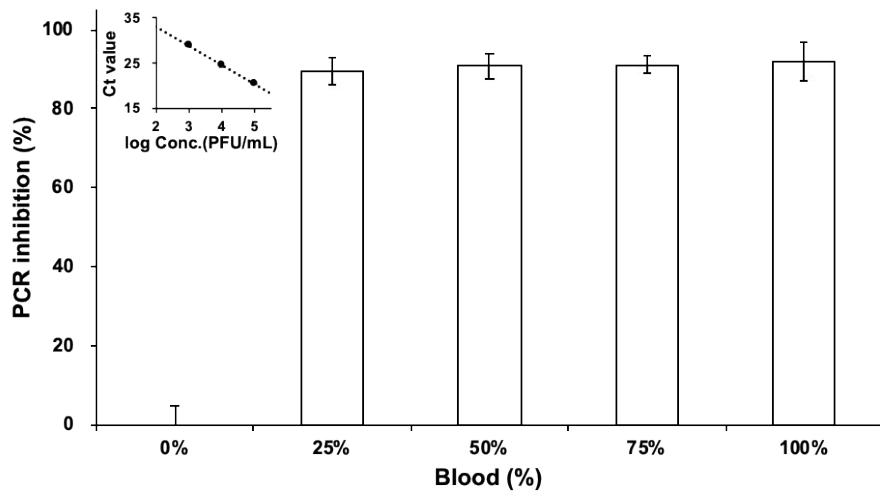

(a)

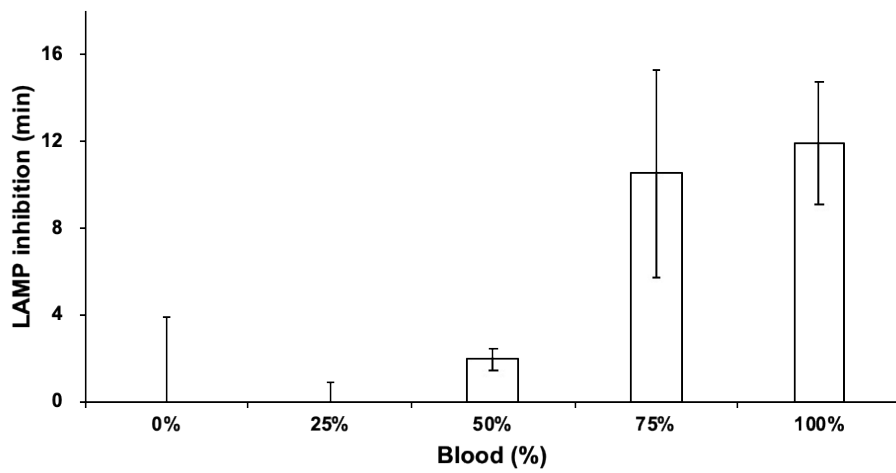

(b)

**Fig. S2.** (a) RT-PCR and (b) LAMP reaction inhibition in whole blood; (a) PCR inhibition (%) =  $100 - \frac{\text{Calculated conc. of sample}}{\text{Calculated conc. of positive control}}$ , (b) LAMP inhibition (min) =  $\text{Detection time of positive control (min)} - \text{Detection time of sample (min)}$

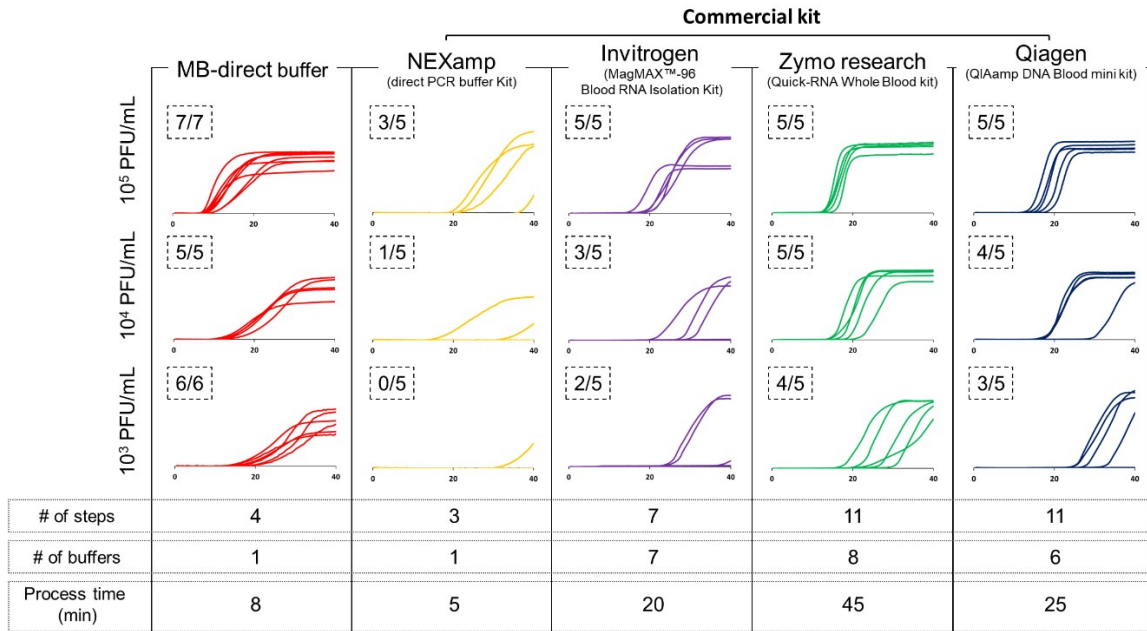

**Fig. S3.** Fluorescence signal for various concentrations of treated dengue virus in whole blood by several kits.

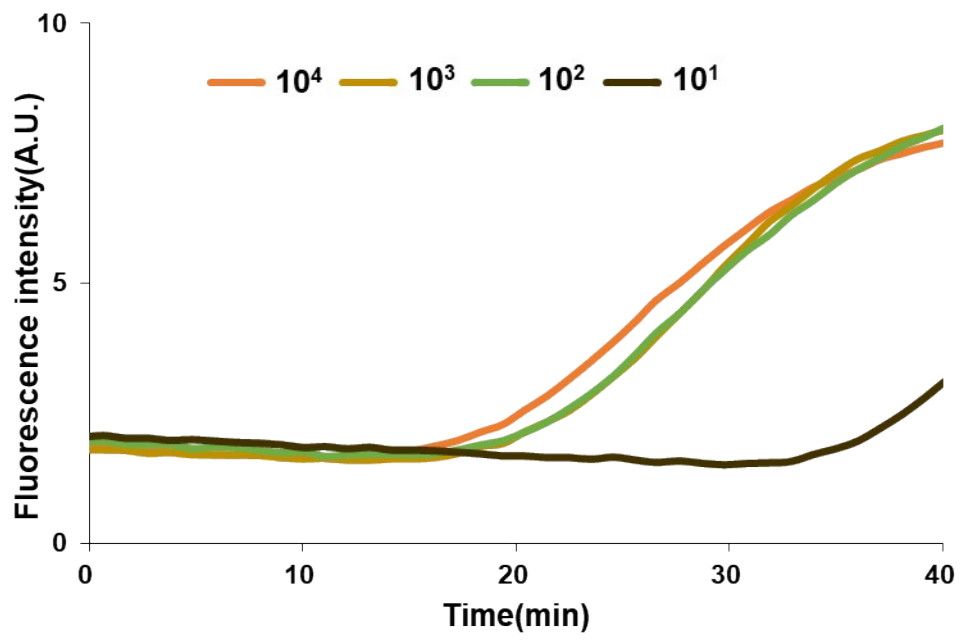

**Fig. S4.** Limit of detection for dengue virus spiked in whole blood by MB-direct buffer system

Table S1. The experimental details of real time RT PCR and LAMP

|                                       | PCR and LAMP reagents                      |                   |               | Amplification conditions |                       |                                                           |                               |
|---------------------------------------|--------------------------------------------|-------------------|---------------|--------------------------|-----------------------|-----------------------------------------------------------|-------------------------------|
|                                       | Components                                 | Amount (µL)       | Total (µL)    | Process                  | Temperature - Time    |                                                           |                               |
| One-step RT-PCR (One-step RT-PCR set) | Reaction buffer                            | 2.0               | 10.0          | Reverse transcriptase    | 50 ° (20 min)         |                                                           |                               |
|                                       | Enzyme mix                                 | 0.5               |               | Pre-incubation           | 95 ° (10 min)         |                                                           |                               |
|                                       | Primer set                                 | 2.0               |               | Denaturation             | 45 cycles             | 95 ° (20 sec)                                             |                               |
|                                       | Sample                                     | 1.0               |               | Amplification            |                       | 60 ° (30 sec)                                             |                               |
|                                       | dH <sub>2</sub> O                          | 4.5               |               |                          |                       |                                                           |                               |
| Two-step RT-PCR                       | RT (Superscript® II Reverse transcriptase) | Enzyme            | 1.0           | 20.0                     | Reverse transcriptase | 65 ° - 42 ° - 42 ° - 72 ° (5 min-2 min - 50 min - 15 min) |                               |
|                                       |                                            | Oligo dT          | 1.0           |                          |                       |                                                           |                               |
|                                       |                                            | Reaction buffer   | 7.0           |                          |                       |                                                           |                               |
|                                       |                                            | Sample            | 11.0          |                          |                       |                                                           |                               |
|                                       | dH <sub>2</sub> O                          |                   |               |                          |                       |                                                           |                               |
|                                       | PCR (TB Green Premix Ex Taq II)            | Enzyme Mix        | 10.0          | 20.0                     | Pre-incubation        | 95 ° (5 min)                                              |                               |
|                                       |                                            | Primer set        | 1.0           |                          | Denaturation          | 45 cycles                                                 | 95 ° (10 sec)                 |
|                                       |                                            | RT Sample         | 2.0           |                          | Amplification         |                                                           | 60 ° - 72 ° (20 sec - 30 sec) |
|                                       |                                            | dH <sub>2</sub> O | 7.0           |                          |                       |                                                           |                               |
|                                       | PCR (TB Green Premix Ex Taq II)            | Enzyme Mix        | 10.0          | 20.0                     | Pre-incubation        | 95 ° (5 min)                                              |                               |
| Primer set                            |                                            | 1.0               | Denaturation  |                          | 45 cycles             | 95 ° (10 sec)                                             |                               |
| Sample                                |                                            | 2.0               | Amplification |                          |                       | 60 ° - 72 ° (20 sec - 30 sec)                             |                               |
| dH <sub>2</sub> O                     |                                            | 7.0               |               |                          |                       |                                                           |                               |
| LAMP (Mmio® dengue detection kit)     | Reaction buffer                            | 12.5              | 25.0          | Isothermal Amplification | 58 ° (40 min)         |                                                           |                               |
|                                       | Enzyme mix                                 | 1.0               |               | Termination              | 80 ° (5 min)          |                                                           |                               |
|                                       | Primer set                                 | 2.0               |               |                          |                       |                                                           |                               |
|                                       | Sample                                     | 2.0               |               |                          |                       |                                                           |                               |
|                                       | dH <sub>2</sub> O                          | 7.5               |               |                          |                       |                                                           |                               |
